# Supplementary material for: Preferences for care towards the end of life when decision-making capacity may be impaired: A large scale cross-sectional survey of public attitudes in Great Britain and the United States
Source: PubMed Central journal article supplement (PMC5381758; doi:10.1371/journal.pone.0172104), 2017-04-05
Supplement: pone.0172104.s002.pdf [file pone.0172104.s002.pdf]

**S1 Table: Respondents selecting “measures to sustain life at any cost” by country and scenario stage (N=2016)**

| Response 1: Measures to sustain life at any cost | Scenario 1: Living in a care home |     | Scenario 2: Losing short-term memory |     | Scenario 3: Choking on food and drink |     | Scenario 4: V. confused & capacity loss |     | Scenario 5: Pneumonia |     | Scenario 6: End stage, bed bound |     |
|--------------------------------------------------|-----------------------------------|-----|--------------------------------------|-----|---------------------------------------|-----|-----------------------------------------|-----|-----------------------|-----|----------------------------------|-----|
|                                                  | Within country                    |     | Within country                       |     | Within country                        |     | Within country                          |     | Within country        |     | Within country                   |     |
|                                                  | %                                 | n   | %                                    | n   | %                                     | n   | %                                       | n   | %                     | n   | %                                | n   |
| All                                              | 18                                | 357 | 30                                   | 610 | 14                                    | 279 | 18                                      | 358 | 17                    | 350 | 17                               | 338 |
| GB                                               | 16                                | 153 | 29                                   | 273 | 15                                    | 144 | 19                                      | 187 | 16                    | 159 | 14                               | 138 |
| USA                                              | 20                                | 204 | 33                                   | 337 | 13                                    | 135 | 17                                      | 171 | 19                    | 191 | 19                               | 199 |

**Notes**

Weighted data are reported, numbers may not sum to total due to rounding
