# Supplementary material for: Preferences for care towards the end of life when decision-making capacity may be impaired: A large scale cross-sectional survey of public attitudes in Great Britain and the United States
Source: PubMed Central journal article supplement (PMC5381758; doi:10.1371/journal.pone.0172104), 2017-04-05
Supplement: pone.0172104.s003.pdf [file pone.0172104.s003.pdf]

**S2 Table: Respondents selecting “measures to help me die peacefully” by country and scenario stage (N=2016)**

| Response 1: <i>Provide measures to help me die peacefully</i> | Scenario 1: <i>Living in a care home</i> |    | Scenario 2: <i>Losing short-term memory</i> |     | Scenario 3: <i>Choking on food and drink</i> |     | Scenario 4: <i>V. confused &amp; capacity loss</i> |     | Scenario 5: <i>Pneumonia</i> |     | Scenario 6: <i>End stage, bed bound</i> |     |
|---------------------------------------------------------------|------------------------------------------|----|---------------------------------------------|-----|----------------------------------------------|-----|----------------------------------------------------|-----|------------------------------|-----|-----------------------------------------|-----|
|                                                               | Within country                           |    | Within country                              |     | Within country                               |     | Within country                                     |     | Within country               |     | Within country                          |     |
|                                                               | %                                        | n  | %                                           | n   | %                                            | n   | %                                                  | n   | %                            | n   | %                                       | n   |
| All                                                           | 4                                        | 78 | 7                                           | 133 | 10                                           | 208 | 23                                                 | 463 | 27                           | 536 | 37                                      | 745 |
| GB                                                            | 6                                        | 55 | 9                                           | 87  | 12                                           | 112 | 24                                                 | 232 | 26                           | 243 | 39                                      | 371 |
| USA                                                           | 2                                        | 23 | 5                                           | 46  | 10                                           | 96  | 23                                                 | 231 | 29                           | 293 | 37                                      | 374 |

**Notes**

Weighted data are reported, numbers may not sum to total due to rounding
