# Supplementary material for: Preferences for care towards the end of life when decision-making capacity may be impaired: A large scale cross-sectional survey of public attitudes in Great Britain and the United States
Source: PubMed Central journal article supplement (PMC5381758; doi:10.1371/journal.pone.0172104), 2017-04-05
Supplement: pone.0172104.s010.pdf [file pone.0172104.s010.pdf]

**S9 Table: Logistic Regression of respondents choosing response 1 “sustain life at any cost” in scenario 6 (n=1854)**

|                     | B      | S.E. | Wald    | df | Sig. | Exp(B) | 95% C.I. for EXP(B) |       |
|---------------------|--------|------|---------|----|------|--------|---------------------|-------|
|                     |        |      |         |    |      |        | Lower               | Upper |
| Step 1 <sup>a</sup> |        |      |         |    |      |        |                     |       |
| age_centered        | -.247  | .040 | 37.284  | 1  | .000 | .781   | .722                | .846  |
| Country(1)          | .221   | .131 | 2.830   | 1  | .093 | 1.247  | .964                | 1.612 |
| Gender(1)           | .121   | .127 | .909    | 1  | .340 | 1.128  | .880                | 1.446 |
| Uni_education(1)    | -.035  | .142 | .061    | 1  | .805 | .965   | .730                | 1.276 |
| Ethnicity           |        |      | 22.069  | 2  | .000 |        |                     |       |
| Ethnicity(1)        | .946   | .203 | 21.719  | 1  | .000 | 2.575  | 1.730               | 3.833 |
| Ethnicity(2)        | .264   | .179 | 2.183   | 1  | .140 | 1.302  | .917                | 1.848 |
| Exp_fam(1)          | .058   | .131 | .193    | 1  | .661 | 1.059  | .819                | 1.370 |
| EXP_PROF            | .098   | .255 | .148    | 1  | .700 | 1.103  | .669                | 1.820 |
| Child_household(1)  | .398   | .138 | 8.375   | 1  | .004 | 1.489  | 1.137               | 1.949 |
| Constant            | -2.140 | .177 | 145.639 | 1  | .000 | .118   |                     |       |

a. Variable(s) entered on step 1: age\_centered, Country, Gender, Uni\_education, Ethnicity, Exp\_fam, EXP\_PROF, Child\_household.
